# Supplementary material for: The Endoparasitoid, Cotesia vestalis, Regulates Host Physiology by Reprogramming the Neuropeptide Transcriptional Network
Source: PubMed Central journal article supplement (PMC4313088; doi:10.1038/srep08173), 2015-02-02
Supplement: srep08173-s1.pdf [file srep08173-s1.pdf]

*Supplementary information*

**The Endoparasitoid, *Cotesia vestalis*, Regulates Host Physiology by Reprogramming the Neuropeptide Transcriptional Network**

Min Shi<sup>1</sup>, Shuai Dong<sup>1</sup>, Ming-tian Li<sup>1</sup>, Yan-yan Yang<sup>1</sup>, David Stanley<sup>2</sup>, Xue-xin Chen<sup>1,\*</sup>

1. Ministry of Agriculture Key Lab of Agricultural Entomology, Institute of Insect Sciences, Zhejiang University, Hangzhou, China
2. Biological Control of Insects Research Laboratory, Agricultural Research Service, U.S. Department of Agriculture, Missouri, USA

**\*Corresponding author:** Xue-xin Chen, Ministry of Agriculture Key Lab of Agricultural Entomology, Institute of Insect Sciences, Zhejiang University, 866 Yuhangtang Road, Hangzhou, 310058, China, email: [xxchen@zju.edu.cn](mailto:xxchen@zju.edu.cn)

**Funding:** this work was jointly by the 973 Program (2013CB127600), the National Science Fund for Innovative Research Groups (31321063), the Zhejiang Science Fund for Distinguished Young Scholars (R3110049) and the Fundamental Research Funds for the Central Universities.

**Table S1.** Specific primers for neuropeptide precursor-related gene for 3' RACE

| Neuropeptides                           | Primers (5' → 3')             |                            |
|-----------------------------------------|-------------------------------|----------------------------|
|                                         | Forward 1                     | Forward 2                  |
| Adipokinetic hormone I                  | CATGGGGAAACTCTTCTAGTCAGCC     | CTTCTAGTCAGCCAGTTAATTGAGC  |
| Adipokinetic hormone II                 | ATGCACAAAATAAGTTTCCTCT        | GCACAAAATAAGTTTCCTCTCG     |
| Allatostatin A                          | CGCTACAAAGTATGCCGATT          | GGAACTTTTGAGTCGTGCTT       |
| Allatostatin C                          | CAGGACGGGATGCTATCTTCA         | CATTGACCTCAACCAGGACGG      |
| Allatotropin                            | ACCGCGTCAGTGCGATTGTG          | CGTCAGTGCATTGTGCAAAGT      |
| Bursicon subunit $\alpha$               | GATCAGTGCTTTCCTTTAAGTCT       | CTTCAGTTAACCAGGTAATCATT    |
| Bursicon subunit $\beta$                | TGCTACAGCATAACAGCTCTCACA      | CACAATTTTTCAGAATAAGTTAGGT  |
| CCHamide                                | CGCAGCTTCTACGAACACCT          | AATGAGTTATGCCGCGGGT        |
| Crustacean cardioactive peptide         | CTGGTCTTCCGTCTGAGGATA         | GCCATCTTGTGCAAAGTGACA      |
| Diuretic hormone                        | TAGGCCATTAGACTGGGGTGTA        | CGCATGAAATCTGTAGAGTGGGA    |
| FMRFamide                               | CATACCCAGCATGTGGAGCC          | CGCCGAGCGCTATTGATA         |
| Ion-transport peptide/ CHH-like protein | AATACGACTCACTATAGGGCAAGCAGTGG | AGTACATGGGGACCGCCACAATAGC  |
| Leucokinin                              | ATCGCGGTGAAATCTCTTTGATGTCC    | CCAGGAACATTTGGAACGGCATCGCT |
| Neuroparsin                             | TCCGAGCGCAGACCTTACAGCAT       | GCCACCAGCCAGACATCTTACATCA  |
| Neuropeptide F2                         | GAAGAGTTTCGAGCAACAATGAGA      | CTCCTCTCCACCATCCTGCTCA     |
| Short Neuropeptide F                    | CACCAACCGCTGAATACTCATAGA      | TGGCGCAGTCAGCCCAAGAG       |
| Neuropeptide-like peptide               | GAAGAGTTTCGAGCAACAATGAGA      | CTCCTCTCCACCATCCTGCTCA     |
| Prothoracicotropic hormone              | TTGAGTGCCGAGGCGTCCAGAT        | AGGCGTCCAGATATGAAGAAGGTA   |
| Tachykinin                              | AGGGCTCAAATGAACGGATTCT        | GGATTCTTCGGAATGCGTGCC      |

**Table S2.** Specific primers for neuropeptide genes for real-time qPCR

| Neuropeptides                           | Primers (5' → 3')          |                           |
|-----------------------------------------|----------------------------|---------------------------|
|                                         | Forward                    | Reward                    |
| Adipokinetic hormone I                  | ACGTTTACGTCAAGTTGGGGA      | CGGTTGTCAAAGACGCGTAG      |
| Adipokinetic hormone II                 | GAGTTTGTAATCGCAATGAGAGTC   | CGCCTTTTTCGTGTTTTTCTG     |
| Allatostatin A                          | GAGCGAGCACATCCACGAAC       | AGTCTTCCTGGTCGATGTTGTTG   |
| Allatostatin C                          | TTTGCGGTAACATTCCTCTCT      | GCGAATAACTGTCTGATAGAACCA  |
| Allatotropin                            | GCTGATGACAAGACCGTGGAG      | CTGAAGATAGCATCCCCTCCTG    |
| Bursicon subunit $\alpha$               | GCAGCGGCGATGTTAGTGT        | CTCCTCGTCAAGGCGAATGC      |
| Bursicon subunit $\beta$                | GTACAAGCTATGTTCAAGTTTCGG   | GGACGACACATACTCAAGCG      |
| CCHamide                                | TTATACTGAACCTGACCTGTGCC    | CAGCGACAAAATAGTTATCAATGG  |
| Crustacean cardioactive peptide         | CGATACCCAGAACTACGAGCAG     | GCCGAGAGTGTCTTCGTCATG     |
| Diuretic hormone                        | AGACAGACTAGCCAAAGATGTGATA  | CGCACTATGTGTTAAAACTATTGT  |
| FMRFamide                               | GACAGCGAAGAGTTGAATGACAC    | CATCTCACTTCAACAAGCACGA    |
| Ion-transport peptide/ CHH-like protein | CTACAGCTTACGCTATGCAAAAAAC  | CTGACACTCGACTGTGAAGGC     |
| Leucokinin                              | GAAGAAGGATGGCAAACGG        | ACGGACAGGAGGTGGAAACT      |
| Neuroparsin                             | TAGAGATGTCTGGCTGGTGGC      | GGTGGTTGTIAGGGCGTGTT      |
| Neuropeptide F2                         | AGAGTTCGCAGCAACAATGAG      | TACTGAAGCGTCTGCTATGTGC    |
| Short Neuropeptide F                    | CTTGCTAACGGATCTTACAACCTACA | AGGGGTATATATTTGAATGTTGTCG |
| Neuropeptide-like peptide               | GATGTAACCGCTCATGCTCTT      | CAGAACCAGCAGAGTGACAAGA    |
| Prothoracicotropic hormone              | CACCACCAAACCTCTGCTCGC      | GTGACTGGCTTCTTGAGGGCTAC   |
| Tachykinin                              | AATGCGTGGCAAGAAGTGG        | TGAAATAATGATTCTGGCAACTACA |
| $\beta$ -tubulin                        | TGGCACCACACCTTCTAC         | CATGATCTGGGTCATCTTCT      |

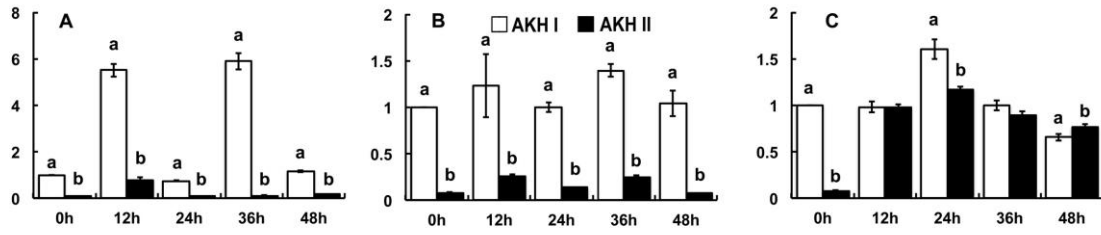

**Figure S1.** Comparison of the transcriptional abundances of pro-adipokinetic hormone I/II in B-CA-CC. A: non-parasitized; B: parasitized; C: CvBV-injected. The relative amounts of pro-neuropeptide gene mRNAs were first normalized to the abundance of  $\beta$ -tubulin mRNAs, then these normalized value was secondly divided by the amount of the pro-AKH I at 0 h under corresponding treatment. “X” axis: Relative transcript abundance; “Y” axis: Hours post parasitization/CvBV-injection; White bar: pro-AKH I; black bar: pro-AKH II. Letters on the top of bars indicate the significantly different means within the relative transcript abundances at specific time points by one-way analysis of variance (ANOVA) analysis (n=3, P < 0.05).
